# Supplementary material
Source: HighWire-hosted journal article supplement (https://erj.ersjournals.com/content/53/6/1900351)
Supplement: inline-supplementary-material-1 [file inline-supplementary-material-1.pdf]

## Online supplement

### Assessing global COPD awareness with *Google Trends*

Anna Boehm, Alex Pizzini, Thomas Sonnweber, Judith Loeffler-Ragg, Claudia Lamina, Guenter Weiss, Ivan Tancevski

#### Analysis of COPD-related terms and topics

For a broader and more comprehensive analysis of the topic "chronic obstructive pulmonary disease", the following related terms were included in this online supplement: "asthma", "bronchitis" and "cough" (available as topics), and "emphysema", "chronic bronchitis" and "sputum" (only existing as terms on GT).

The "COPD"-related topics "asthma" and "bronchitis" revealed an RSV of  $22.17 \pm 3.47$  and  $10.42 \pm 2.81$  respectively (online supplementary [Figure S4](#)). The topic "cough" displayed an RSV which at some time-point even surmounted "diabetes", and in a direct comparison with "COPD" was searched 4.8 times more often.

The terms "chronic bronchitis" and "emphysema" only existed as search terms and not as topics in GT, hence from a methodological point of view a direct comparison with "COPD" is not appropriate. However, if direct comparison is performed, "chronic bronchitis" displayed an RSV below 1.0 and "emphysema" showed an RSV of 1.0 to 2.0, with a single peak of 4.0 ("COPD" RSV in comparison: mean 9.15, SD 1.2).
